# Supplementary material
Source: PubMed Central journal article supplement (PMC10433848)
Supplement: spectrum.04339-22-s0001.pdf [file spectrum.04339-22-s0001.pdf]

## SUPPLEMENTAL MATERIAL

### Materials and Methods

**Strains and media.** Six strains of *Aspergillus flavus* were used for susceptibility tests: NRRL3518 (obtained from USDA Agricultural Research Service Culture Collection, Peoria, IL, United States), SS1 and SS2 (both isolated from stored wheat grains), SS3 (isolated from silage), SS4 (isolated from groundnuts), and SS5 (isolated from chickpeas). After determining that VRC resistance was consistent across a range of isolates (0.125 µg/ml for all tested strains), we chose the highly aflatoxigenic strain of *A. flavus* (SS1) to generate all strains used in this study (Table 1). Strains were refreshed from -80 °C by subculturing on potato dextrose agar (PDA; 0.4% potato starch, 2% dextrose, and 2% agar) or broth (PDB) and maintained on PDA plates at 28 °C. Conidia were collected in sterile saline and spore concentrations were determined using a hemocytometer. The viability of inoculum was verified by determining colony forming units (CFUs) on PDA. Stock solutions of VRC (Sigma-Aldrich, St. Louis, MO, USA) were prepared in DMSO at a concentration of 20 mg/ml and kept at -20 °C. Antifungal microdilution susceptibility testing was performed on RPMI 1640 medium (Sigma-Aldrich) buffered with 0.165 M morpholinepropanesulfonic acid (MOPS) pH 7.

**Susceptibility testing.** The susceptibility of *A. flavus* isolates to VRC was determined using Etest assays and the CLSI method. For Etests, 200 µl of *A. flavus* conidial suspension (containing 10<sup>6</sup> spores/ml) was spread on PDA. After inoculation, a VRC Etest strip (bioMérieux, Marcy l'Etoile, France) was placed in the center of the plate and the plate was incubated at 30 °C for 72 h. The CLSI M38-A2 broth microdilution method was performed according to standard guidelines (25).

**Screening for resistance.** Conidial suspensions (~1 x 10<sup>3</sup> spores/ml) were plated onto PDA plates amended with various concentrations of VRC (0, 0.125, 0.25, 0.5, 1, and 2 µg/ml). Growth was recorded after 96 h incubation at 28 °C. Isolates were considered resistant to VRC based on their ability to grow on plates containing VRC. Resistant subpopulations were exposed to stepwise increases in VRC concentrations on PDA media.

Highly resistant clones (2 and 4 µg/ml VRC) were used to study the stability of their resistance phenotype. Conidial suspensions of four isolates resistant to high concentrations of VRC were transferred onto drug-free PDA plates and incubated at 28 °C; such transfers were carried out every 96 h. After serial transfers on drug-free media the isolates were tested for their susceptibility to VRC.

**Whole-genome sequencing.** To obtain tissue for DNA extractions, *A. flavus* SS1 wild-type strain and VRC resistant clones were grown in PDB amended with VRC concentrations corresponding to their resistance (0 – 4 µg/ml) at 28 °C for 4 days. Fungal mycelia were collected, lyophilized, and genomic DNA was isolated using a cetyltrimethylammonium bromide (CTAB) extraction method (Sadhasivam et al., 2017). Paired-end libraries (150 bp) were prepared using TruSeq DNA Nano Library Prep Kit and sequenced using an Illumina NovaSeq 6000 platform. Following quality control and adapter trimming, paired-end reads of the 10 samples were mapped to the *Aspergillus flavus* NRRL3357 reference genome (assembly ASM1411746v1 from the

NCBI database) using the BWA-MEM algorithm (Li, 2013). The resulting mapping files were processed using Picard Tools v1.95 to add read group information, sort, mark duplicates and index. Then, we performed a local re-alignment of reads to minimize mismatched bases using the RealignerTargetCreator of the Genome Analysis Toolkit (GATK) v4.1.9.0. Finally, we called single nucleotide polymorphism (SNPs) and insertions and deletions (indels) using HaplotypeCaller of the GATK toolkit (DePristo et al., 2011). The predicted effect of variants was determined using SnpEff v5.0d (Cingolani et al., 2012) with publicly available gene models (genome annotation GCF\_014117465.1 from the NCBI database). Copy number variation (CNV) was identified using CNVkit v0.9.7 (Talevich et al., 2016) in whole-genome sequencing (-wgs) mode. Coverage bigwig files were generated with the bamCoverage tool and ratios were calculated using bigwigCompare (deepTools v3.5.1) (Ramírez et al., 2016).

**Quantitative real-time PCR.** We performed qPCR assays to quantify the copy number of genes located on specific chromosomes in both wild-type and VRC-resistant strains. CNVs identified using whole-genome sequence data were confirmed by qPCR using the same sample of genomic DNA. Experiments were run in triplicate using Fast SYBR Green Master Mix in a StepOnePlus Real-Time PCR System (Applied Biosystems). The copy number of genes across seven chromosomes were standardized using the gene G4B84\_009880 on Chr6 as endogenous control (Table S2). The relative copy number of each gene ( $2^{-\Delta\Delta Ct}$ ) was obtained in comparison to the endogenous control. Results were analyzed with StepOne software. The sequences of the primers used for the qPCR are listed in Table S2.

-----  
**TABLE S1. VRC MIC values of *Aspergillus flavus* wild type strains.** The name, source, and VRC MIC (determined using Etest strips and CLSI method) is summarized for each of the six WT strains.

| # | Strain name | Source                 | VRC MIC (µg/ml) |
|---|-------------|------------------------|-----------------|
| 1 | NRRL3518    | ARS culture collection | 0.125           |
| 2 | SS1         | Wheat                  | 0.125           |
| 3 | SS2         | Wheat                  | 0.125           |
| 4 | SS3         | Silage                 | 0.125           |
| 5 | SS4         | Peanut                 | 0.125           |
| 6 | SS5         | Chickpea               | 0.125           |

**TABLE S2. Primers used for qPCR assays**

| Target       | Chromosome location    | Locus tag    | Gene name       | Primer sequence             | Product size | Amplification efficiency | Source            |
|--------------|------------------------|--------------|-----------------|-----------------------------|--------------|--------------------------|-------------------|
| <i>chr1A</i> | Chr1<br>(1.71/6.39 Mb) | G4B84_000547 | <i>mdr1</i>     | CCTCCCACAAGAGTGATAGA        | 107 bp       | 101.1%                   | Paul et al., 2018 |
|              |                        |              |                 | CGCATCGAGCTGTTTCTT          |              |                          |                   |
| <i>chr2A</i> | Chr2<br>(5.44/6.25 Mb) | G4B84_003868 | <i>mdr2</i>     | GATATCTCCAATAAGGGTACAAAGG   | 104 bp       | 100.9%                   | Paul et al., 2018 |
|              |                        |              |                 | TGAAGATGGGAACAGCAGGTC       |              |                          |                   |
| <i>chr3A</i> | Chr3<br>(3.73/5.10 Mb) | G4B84_005397 | <i>creA</i>     | TGCCGGACAAGAGAATGCA         | 80 bp        | 100.7%                   | This study        |
|              |                        |              |                 | AGCGGGTCATAGGCTTTGTG        |              |                          |                   |
| <i>chr3B</i> | Chr3<br>(4.12/5.10 Mb) | G4B84_005516 | <i>chsE</i>     | ATCTTCATCTTCCGCCGCAAGTG     | 114 bp       | 100.6%                   | Li et al., 2021   |
|              |                        |              |                 | GTCATCCATGTGCCAGAACGAGTAG   |              |                          |                   |
| <i>chr4A</i> | Chr4<br>(1.90/4.66 Mb) | G4B84_006515 | <i>mdr4</i>     | GGTCAGCGTCAACGACTTTC        | 176 bp       | 103.5%                   | Paul et al., 2018 |
|              |                        |              |                 | ATCGTGTTGAGCCGGTGAG         |              |                          |                   |
| <i>chr5A</i> | Chr5<br>(2.23/4.45 Mb) | G4B84_008177 | <i>β-actin</i>  | ACGGTGTCGTCACAACTGG         | 130 bp       | 102.0%                   | Lan et al., 2019  |
|              |                        |              |                 | CGGTTGGACTIONAGGGTTGATAG    |              |                          |                   |
| <i>chr6A</i> | Chr6<br>(2.84/3.94 Mb) | G4B84_009880 | <i>bgt1</i>     | GTACTIONGCCGATCCCATCATCCAAG | 126 bp       | 95.8%                    | Li et al., 2021   |
|              |                        |              |                 | CCTTAGCAAGCCTCGTGTCATTCC    |              |                          |                   |
| <i>chr7A</i> | Chr7<br>(1.04/3.03 Mb) | G4B84_010605 | <i>cdr1B</i>    | GAAGTATCTGCCACCGAGAA        | 150 bp       | 103.5%                   | Paul et al., 2018 |
|              |                        |              |                 | GCCATCGACATGATCGAGAA        |              |                          |                   |
| <i>chr8A</i> | Chr8<br>(0.28/3.18 Mb) | G4B84_011340 | <i>mfs1</i>     | ACAACGCCCCGCATAGTC          | 103 bp       | 98.1%                    | Paul et al., 2018 |
|              |                        |              |                 | TTGCTGTTACGCAGTTCATCG       |              |                          |                   |
| <i>chr8B</i> | Chr8<br>(0.38/3.18 Mb) | G4B84_011371 | <i>nrps-mrp</i> | CATCGGAGTGCCACAAGATG        | 148 bp       | 104.7%                   | This study        |
|              |                        |              |                 | ACCATGTGACCCATTAGCCA        |              |                          |                   |
| <i>chr8C</i> | Chr8<br>(3.05/3.18 Mb) | G4B84_012248 | <i>pks8.12</i>  | ACCCGTCGATGGGAACAAT         | 70 bp        | 97.8%                    | This study        |
|              |                        |              |                 | AGCAATTATGCGGTGATCGTT       |              |                          |                   |
| <i>chr8D</i> | Chr8<br>(2.08/3.18 Mb) | G4B84_011919 | <i>nrps8.6</i>  | TTGTGGCGGATGTATTTGGA        | 70 bp        | 100.0%                   | This study        |
|              |                        |              |                 | AATGAGGACCCGCCATTAC         |              |                          |                   |

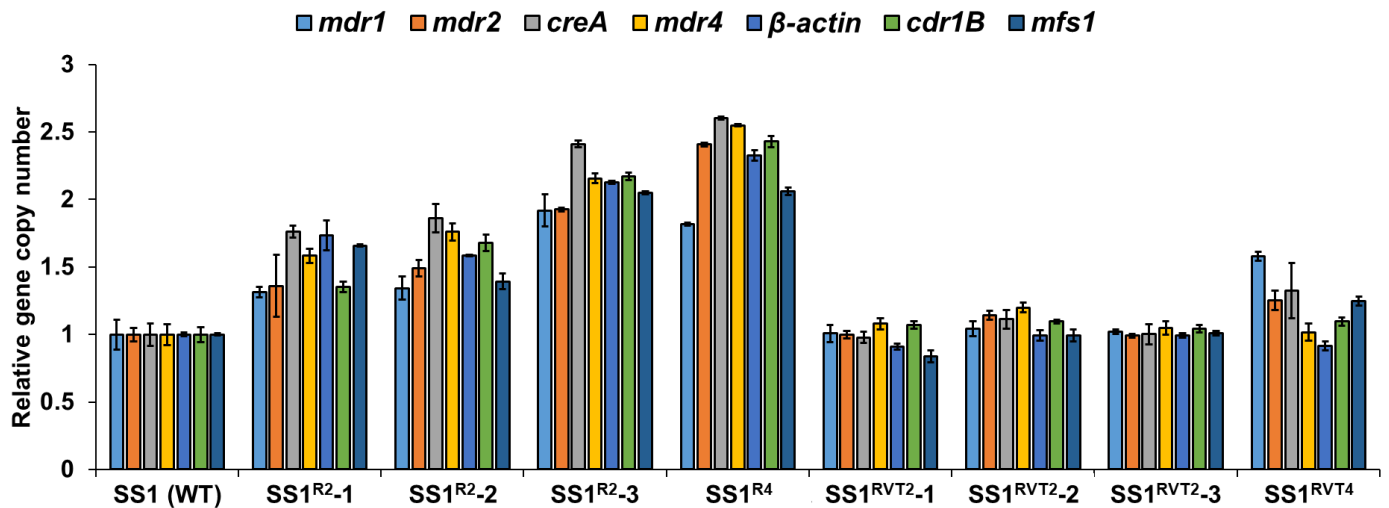

**FIG S1. Gene copy number determined by qPCR in VRC resistant and reverted strains.** The relative copy number of seven genes (*mdr1*, *mdr2*, *creA*, *mdr4*,  $\beta$ -actin, *cdr1B*, *mfs1*) located on Chr1, 2, 3, 4, 5, 7 and 8 was determined relative to the control gene (*bgt1*) on Chr6. Resistant strains are named SS1<sup>R2-1</sup>, SS1<sup>R2-2</sup>, SS1<sup>R2-3</sup>, SS1<sup>R4</sup> and reverted strains are named SS1<sup>RVT2-1</sup>, SS1<sup>RVT2-2</sup>, SS1<sup>RVT2-3</sup>, SS1<sup>RVT4</sup>.

---

## References

- Sadhasivam S, et al. 2017. Rapid detection and identification of mycotoxigenic fungi and mycotoxins in stored wheat grain. *Toxins* 9:302, 10.3390/toxins9100302.
- Li H. 2013. Aligning sequence reads, clone sequences and assembly contigs with BWA-MEM. arXiv:1303.3997. [doi.org/10.48550/arXiv.1303.3997](https://doi.org/10.48550/arXiv.1303.3997)
- DePristo MA, et al. 2011. A framework for variation discovery and genotyping using next-generation DNA sequencing data. *Nat Genet.* 43:491–501.
- Cingolani P, et al. 2012. A program for annotating and predicting the effects of single nucleotide polymorphisms, SnpEff. *Fly (Austin)*. 6:80–92. [doi.org/10.4161/fly.19695](https://doi.org/10.4161/fly.19695)
- Talevich E, Shain AH, Botton T, Bastian BC. 2016. CNVkit: genome-wide copy number detection and visualization from targeted DNA sequencing. *PLoS Comput Biol* 12:e1004873.
- Ramírez F, et al. 2016. deepTools2: a next generation web server for deep-sequencing data analysis. *Nucleic Acids Res.* 44 (W1), W160–W165.
- Paul RA, et al. 2018. Magnitude of voriconazole resistance in clinical and environmental isolates of *Aspergillus flavus* and investigation into the role of multidrug efflux pumps. *Antimicrob Agents Chemother* 62:e01022-18. [doi: 10.1128/AAC.01022-18](https://doi.org/10.1128/AAC.01022-18).
- Li Q, Zhao Y, Xie Y. 2021. Paeonol disrupts the integrity of *Aspergillus flavus* cell walls via releasing surface proteins, inhibiting the biosynthesis of  $\beta$ -1,3-glucan and

promoting the degradation of chitin, and an identification of cell surface proteins. *Foods* 10(12):2951. doi: 10.3390/foods10122951.

Lan H, et al. 2019. The HosA histone deacetylase regulates aflatoxin biosynthesis through direct regulation of aflatoxin cluster genes. *Mol Plant Microbe Interact* 32:1210-1228. doi: 10.1094/MPMI-01-19-0033-R.
